# Supplementary material for: Clinical Pathology Reference Intervals for an In-Water Population of Juvenile Loggerhead Sea Turtles (Caretta caretta) in Core Sound, North Carolina, USA
Source: PLoS One. 2015 Mar 4;10(3):e0115739. doi: 10.1371/journal.pone.0115739 (PMC4349656; doi:10.1371/journal.pone.0115739)
Supplement: S1 Table — (XLS) [file pone.0115739.s001.xls]

## Sheet: Kelly et al. Table S1_Loggerhea
Table S1. Demographic and clinical pathology data for juvenile loggerhead sea turtles sampled for this study.
ID	Year	Season	Water_Temp	Lap	Sex	Straight_Carapace_Length_Tip	Packed_Cell_Volume_(%)	WBC_est (X 10^9/L)	Hets (X 10^9/L)	Lymphs (X 10^9/L)	Monos (X 10^9/L)	Eos (X 10^9/L)	Basos (X 10^9/L)	Azuros (X 10^9/L)	Glucose_(mg/dL)	Glucose_(mmol/L)	Blood_Urea_Nitrogen_(mg/dL)	Blood_Urea_Nitrogen_(mmol/L)	Total_Protein_(g/dL)	Total_Protein_(g/L)	Albumin_(g/dL)	Albumin_(g/L)	Aspartate_aminotransferase_(U/L)	Calcium_(mg/dL)	Calcium_(mmol/L)	Phosphorus_(mg/dL)	Phosphorus_(mmol/L)	Calcium/Phosphorus_((mg/dL)/(mg/dL))	Calcium/Phosphorus_((mmol/L)/(mmol/L))	Sodium_(mmol/L)	Potassium_(mmol/L)	Chloride_(mmol/L)	Globulin_(g/dL)	Globulin_(g/L)	Creatine_Phosphokinase_(U/L)	Uric_Acid_(mg/dL)	Uric_Acid_(µmol/L)
Cc 0201	2004	Fall	23	Y	M	70.5	22	14	10.08	2.52	0.42	0.56	0	0.42	109	6.05	141	50.34	2.9	29	0.9	9	124	7.1	1.78	10.7	3.46	0.66	0.51	162	4.2	121	2	20	237	1	59.48
Cc 0315	2004	Summer	29	N	F	69.3	40	6	3.48	2.28	0.12	0.12	0	0	143	7.94	134	47.84	4.7	47	1.6	16	244	9.7	2.43	6.3	2.03	1.54	1.19	163	4.6	116	3.1	31	437	2.3	136.8
Cc 0492	2006	Fall	21	Y	F		31	16	12.16	2.72	0.48	0.32	0.32	0	86	4.77	120	42.84	4	40	1.2	12	143	8.6	2.15	6.1	1.97	1.41	1.09	157	3.8	115	2.8	28	958	1.1	65.43
Cc 0654	2004	Summer	26.5	N	Unknown	59.2	34	10	1	8.9	0	0.1	0.001	0.001	136	7.55	136	48.55	4.2	42	1.4	14	234	8.4	2.1	10.1	3.26	0.83	0.64	158	3.5	115	2.8	28	165	1	59.48
Cc 0746	2007	Summer	24	N	M		31	9	4.41	3.06	0.72	0.81	0	0	117	6.49	97	34.63	4.3	43	1.2	12	225	8.9	2.23	8.5	2.75	1.05	0.81	160	5.1	113	3.1	31	751	0.9	53.53
Cc 0774	2005	Fall	19.5	Y	Unknown		35	5	3.85	1.05	0.1	0	0	0	128	7.1	115	41.06	4.3	43	1.5	15	227	8.2	2.05	7.4	2.39	1.11	0.86	156	4.5	113	2.8	28	941	0.7	41.64
Cc 1094	2004	Fall	22	Y	F	78.9	33	15	4.8	7.05	1.05	1.8	0.3	0	94	5.22	77	27.49	5.3	53	1.7	17	192	7.1	1.78	6.8	2.2	1.04	0.81	163	4.1	123	3.6	36	402	1.2	71.38
Cc 1111	2004	Summer	26	N	M	77.4	35	10	7.5	1.7	0.4	0.4	0	0	107	5.94	97	34.63	4.9	49	1.6	16	281	8.8	2.2	7.2	2.33	1.22	0.95	155	4.7	115	3.3	33	961	1.7	101.12
Cc 1195	2005	Summer	29	N	F		38	9	3.33	4.86	0	0.81	0	0	148	8.21	44	15.71	4.1	41	1.2	12	304	6.8	1.7	6.8	2.2	1	0.77	159	4.6	116	2.9	29	760	0.6	35.69
Cc 1253	2005	Summer	29	N	F		31	12	4.32	4.08	0.12	3.48	0	0	120	6.66	44	15.71	4.3	43	1.3	13	231	8.3	2.08	7.1	2.29	1.17	0.9	157	4.2	121	3	30	784	1.1	65.43
Cc 1270	2006	Fall	21	Y	F		24	9	6.48	1.98	0.36	0.09	0.09	0	104	5.77	130	46.41	3.9	39	1.3	13	136	8.1	2.03	8.5	2.75	0.95	0.74	152	3.4	111	2.6	26	484	0.6	35.69
Cc 1325	2004	Fall	22	Y	M	64.4	32	15	11.4	3	0.3	0.3	0	0	99	5.49	94	33.56	4.3	43	1.4	14	135	7.6	1.9	7.9	2.55	0.96	0.74	159	4.1	112	2.9	29	736	0.6	35.69
Cc 1385	2004	Summer	27	Y	F	84.7	39	9	3.96	4.14	0	0.81	0	0.09	94	5.22	145	51.77	5.3	53	1.6	16	231	8.4	2.1	8.2	2.65	1.02	0.79	154	3.8	113	3.7	37	410	1.3	77.32
Cc 1430	2004	Summer	26.5	N	F	77.7	38	10	3.2	6.1	0	0.3	0.3	0.1	131	7.27	102	36.41	6	60	1.4	14	257	8.7	2.18	7.8	2.52	1.12	0.86	155	4.5	107	4.6	46	1269	0.8	47.58
Cc 1443	2004	Fall	22	N	F	63.4	27	16	9.44	6.08	0.32	0.16	0	0	97	5.38	60	21.42	3.5	35	1.3	13	192	6.2	1.55	7.4	2.39	0.84	0.65	154	4.1	113	2.2	22	2169	1.3	77.32
Cc 1458	2004	Summer	25.5	Y	F	61.9	32	9	1.8	7.02	0	0.18	0	0	103	5.72	150	53.55	3.8	38	1.6	16	163	8.7	2.18	8.4	2.71	1.04	0.8	153	4.6	112	2.2	22	2357	1.7	101.12
Cc 1675	2004	Summer	20	Y	M	56.6	28	2	1.28	0.64	0.04	0	0	0.04	87	4.83	79	28.2	3.5	35	1	10	191	7.2	1.8	5.6	1.81	1.29	1	150	3.6	108	2.5	25	1020	2.4	142.75
Cc 1850	2004	Summer	27	N	M	64.4	31	9	5.04	3.42	0.45	0.09	0	0	115	6.38	40	14.28	3.5	35	1.4	14	187	9.3	2.33	6.3	2.03	1.48	1.14	155	4.8	120	2.1	21	579	0.6	35.69
Cc 1863	2004	Summer	25	Y	F	70.5	36	5	2.6	2.1	0	0.1	0	0.2	113	6.27	98	34.99	3.1	31	1.2	12	110	8.8	2.2	5.5	1.78	1.6	1.24	156	4.1	109	1.9	19	525	0.6	35.69
Cc 1893	2004	Fall	23	Y	F	69.7	32	16	12.32	2.72	0.8	0.16	0	0	132	7.33	167	59.62	5	50	1.6	16	197	8.8	2.2	7.9	2.55	1.11	0.86	162	4	109	3.4	34	424	0.8	47.58
Cc 1897	2004	Fall	24	Y	F	51.5	31	10	6.2	3	0.4	0.2	0	0.2	85	4.72	74	26.42	3.7	37	0.9	9	155	6.3	1.58	5.3	1.71	1.19	0.92	159	4.2	118	2.8	28	2075	1	59.48
Cc 1910	2005	Summer	25	N	M		28	8	2.64	4.8	0	0.56	0	0	97	5.38	62	22.13	4.1	41	1.2	12	151	8	2	7.5	2.42	1.07	0.83	152	3.9	117	2.9	29	507	1	59.48
Cc 1916	2004	Summer	20	Y	F	54.5	23	10	5.4	4.3	0.3	0	0	0	89	4.94	164	58.55	2.9	29	0.9	9	180	8.8	2.2	5.7	1.84	1.54	1.19	154	4.2	111	2	20	764	0.6	35.69
Cc 1931	2004	Fall	19.5	Y	F	78.9	32	10	7	2.1	0.1	0.7	0.1	0	95	5.27	111	39.63	4.1	41	1.3	13	149	8.6	2.15	8.9	2.87	0.97	0.75	156	4.3	112	2.8	28	467	1.3	77.32
Cc 1948	2004	Fall	23	Y	F	61.8	33	10	6.6	3	0.4	0	0	0	89	4.94	94	33.56	3.2	32	1	10	150	6.1	1.53	6.3	2.03	0.97	0.75	162	4.7	117	2.2	22	801	0.6	35.69
Cc 1951	2006	Summer	21.5	Y	M	70.4	27	8	4.32	2.88	0.16	0	0.32	0.32	121	6.72	123	43.91	2.8	28	0.8	8	126	8.6	2.15	8.7	2.81	0.99	0.77	158	4.1	118	2	20	1396	1	59.48
Cc 1955	2005	Fall	26	Y	F		28	8	2.24	5.36	0	0.4	0	0	84	4.66	98	34.99	4	40	1.1	11	176	7.5	1.88	6.2	2	1.21	0.94	158	3.7	115	2.9	29	826	1.4	83.27
Cc 1979	2004	Summer	28	N	F	64.2	29	5	2.6	2.25	0.05	0.05	0.05	0	76	4.22	67	23.92	3.7	37	1.5	15	197	6.8	1.7	7.4	2.39	0.92	0.71	162	4.1	125	2.2	22	4293	1	59.48
Cc 2022	2004	Fall	23	Y	F	64.7	24	7	4.69	1.26	0.49	0.56	0	0	154	8.55	89	31.77	3.6	36	1.2	12	154	7.2	1.8	7.8	2.52	0.92	0.71	163	5	122	2.4	24	662	0.3	17.84
Cc 2025	2004	Fall	11	N	Unknown	64.8	19	10	7.3	2.5	0.2	0	0	0	113	6.27	112	39.98	3.3	33	1.1	11	50	7	1.75	6.5	2.1	1.08	0.83	154	2.9	113	2.2	22	2643	0.4	23.79
Cc 2063	2004	Fall	22	N	M	64.1	35	6	1.98	3.42	0.6	0	0	0	96	5.33	62	22.13	2.7	27	1.1	11	119	5.9	1.48	6.2	2	0.95	0.74	154	4.5	114	1.6	16	517	1	59.48
Cc 2070	2004	Fall	19.5	Y	M	54.7	27	9	4.68	4.14	0	0.18	0	0	126	6.99	95	33.92	3.7	37	1.2	12	188	7.8	1.95	8.8	2.84	0.89	0.69	155	3.9	109	2.5	25	950	2.2	130.86
Cc 2108	2004	Fall	22	Y	F	75.8	32	15	8.1	4.8	1.65	0.3	0.15	0	87	4.83	99	35.34	4.5	45	1.6	16	186	8	2	9.8	3.17	0.82	0.63	153	4.3	113	2.9	29	661	2.4	142.75
Cc 2121	2004	Summer	26	N	M	66.4	28	7	3.92	2.31	0.28	0	0.28	0.21	95	5.27	76	27.13	2.7	27	0.9	9	267	7	1.75	7.1	2.29	0.99	0.76	157	4.2	120	1.8	18	1181	1.6	95.17
Cc 2131	2004	Summer	28.5	N	F	60.3	36	12	2.4	8.28	0.12	0	0	1.2	96	5.33	55	19.64	3.9	39	1.4	14	168	7.9	1.98	6.7	2.16	1.18	0.91	155	4	115	2.5	25	1233	1	59.48
Cc 2133	2004	Summer	26.5	Y	F	76.4	18	14	4.34	9.24	0	0.28	0	0.14	104	5.77	60	21.42	2.7	27	0.8	8	285	7.7	1.93	8.8	2.84	0.88	0.68	154	4	118	1.9	19	153	1.6	95.17
Cc 2138	2004	Fall	22	N	F	70.5	33	14	5.32	7.14	0.42	0.7	0	0.42	115	6.38	124	44.27	3.6	36	1.4	14	228	8.2	2.05	11.1	3.59	0.74	0.57	156	4.2	109	2.2	22	967	0.8	47.58
Cc 2141	2004	Summer	27	N	F	63.5	34	6	3.3	1.98	0.3	0.42	0	0	107	5.94	56	19.99	3.1	31	1.3	13	174	6.9	1.73	6.1	1.97	1.13	0.88	157	4.6	120	1.8	18	1195	0.9	53.53
Cc 2142	2004	Summer	28	N	Unknown	62.7	35	8	1.28	5.92	0	0.64	0	0.16	115	6.38	40	14.28	3	30	1.1	11	151	11.5	2.88	5.1	1.65	2.25	1.75	160	4.4	116	1.9	19	689	1.3	77.32
Cc 2144	2004	Fall	22	N	F	80.2	27	12	6.48	3.36	0.6	1.44	0.12	0	90	5	98	34.99	4.8	48	1.1	11	182	5.8	1.45	7.2	2.33	0.81	0.62	159	4.3	115	3.7	37	949	0.3	17.84
Cc 2150	2004	Summer	25	Y	F	64.2	27	15	10.95	3.3	0	0.45	0	0.3	100	5.55	71	25.35	2.4	24	1	10	131	6	1.5	7.2	2.33	0.83	0.65	155	4.4	112	1.4	14	523	0.9	53.53
Cc 2154	2004	Summer	26.5	Y	F	60.1	35	10	3.2	5.6	0	1.1	0	0.1	123	6.83	103	36.77	3.8	38	1.5	15	168	8.5	2.13	8.1	2.62	1.05	0.81	160	3.8	117	2.3	23	822	1.2	71.38
Cc 2223	2004	Summer	25	Y	M	70.4	23	5	2.5	2.1	0	0.3	0	0.1	92	5.11	85	30.35	4.1	41	1.2	12	200	7.5	1.88	7.5	2.42	1	0.77	157	5.2	114	2.9	29	567	0.7	41.64
Cc 2225	2004	Summer	25	Y	F	60.9	33	7	3.08	3.78	0	0.07	0	0.07	107	5.94	103	36.77	3.3	33	1.3	13	128	7.5	1.88	6.4	2.07	1.17	0.91	159	4.2	114	2	20	493	1	59.48
Cc 2229	2004	Fall	22	Y	M	64.7	29	12	8.04	2.28	0.84	0.48	0.36	0	111	6.16	131	46.77	4.1	41	1.4	14	170	7.2	1.8	7.2	2.33	1	0.77	153	4.3	109	2.7	27	533	1.1	65.43
Cc 2242	2004	Fall	11	N	Unknown	55.6	25	16	12.16	2.56	0.96	0.32	0	0	79	4.38	100	35.7	3.1	31	1.1	11	109	5.2	1.3	7.5	2.42	0.69	0.54	155	2.8	116	2	20	1702	0.2	11.9
Cc 2259	2004	Summer	26.5	Y	F	65.4	27	10	2	7.2	0	0.2	0	0.6	98	5.44	160	57.12	2.6	26	0.9	9	133	8.5	2.13	5.9	1.91	1.44	1.12	153	4.9	112	1.7	17	560	1.4	83.27
Cc 2265	2004	Summer	25	Y	F	57.4	33	6	0.22	3.54	0	0.06	0	0.18	106	5.88	74	26.42	3.1	31	1.2	12	155	9.4	2.35	5.6	1.81	1.68	1.3	152	4.3	110	1.9	19	532	1.6	95.17
Cc 2281	2004	Fall	22	Y	F	66.8	34	13	5.85	5.46	0.78	0.78	0.13	0	73	4.05	60	21.42	4.2	42	1.3	13	181	6.4	1.6	6.4	2.07	1	0.77	160	4.7	113	2.9	29	2236	1.8	107.06
Cc 2296	2004	Summer	26	N	M	65	29	12	10.56	1.08	0.24	0.12	0	0	78	4.33	75	26.78	4	40	1.3	13	362	7.5	1.88	5.5	1.78	1.36	1.06	157	4.7	118	2.7	27	998	1	59.48
Cc 2307	2004	Summer	25	N	M	63.7	25	8	1.92	5.84	0	0.08	0	0.16	109	6.05	110	39.27	4.2	42	1.4	14	250	10.1	2.53	6.8	2.2	1.49	1.15	159	5	110	2.8	28	4441	1	59.48
Cc 2313	2005	Summer	26	N	F		30	7	4.76	2.1	0	0	0.14	0	104	5.77	116	41.41	3.3	33	1	10	184	8.7	2.18	4.2	1.36	2.07	1.6	158	4.8	125	2.3	23	519	0.3	17.84
Cc 2328	2004	Summer	25	Y	M	85.6	35	10	5.1	3.9	0	0.1	0.1	0.8	93	5.16	41	14.64	3.8	38	1.1	11	153	8.2	2.05	6.4	2.07	1.28	0.99	153	4	111	2.7	27	903	1.2	71.38
Cc 2329	2004	Summer	28	Y	F	57.2	29	10	5	4.8	0	0.2	0	0	122	6.77	119	42.48	2.8	28	1.2	12	157	8.3	2.08	6.9	2.23	1.2	0.93	153	4.5	115	1.6	16	515	0.9	53.53
Cc 2342	2005	Summer	27		M	75.3	31	6	4.38	1.2	0.24	0.18	0	0	110	6.11	110	39.27	3.7	37	0.7	7	184	7.2	1.8	6.5	2.1	1.11	0.86	156	5.7	116	3	30	2050	1.2	71.38
Cc 2368	2004	Summer	27	N	Unknown	63.8	36	5	3.4	0.9	0	0.2	0.2	0.3	90	5	54	19.28	3.1	31	1.5	15	237	7.3	1.83	5.9	1.91	1.24	0.96	160	4.3	118	1.6	16	1972	1.5	89.22
Cc 2389	2005	Fall	23	Y	M		31	10	5.3	3.5	0.5	0.3	0.4	0	149	8.27	128	45.7	4.7	47	1.6	16	205	8.5	2.13	8.3	2.68	1.02	0.79	156	4.9	101	3.1	31	370	0.6	35.69
Cc 2390	2004	Fall	19	N	Unknown	63.9	24	14	11.06	1.96	0.28	0.28	0	0.42	82	4.55	161	57.48	3	30	1	10	161	7.4	1.85	4.9	1.58	1.51	1.17	162	3.9	117	2	20	3019	1.6	95.17
Cc 2397	2005	Summer	31	N	F		30	7	0	5.32	0.07	1.61	0	0	114	6.33	53	18.92	3.1	31	0.7	7	158	7	1.75	6.2	2	1.13	0.87	149	4.4	114	2.4	24	262	0.4	23.79
Cc 2402	2005	Summer	24	N	M	58	31	12	10.56	1.32	0.12	0	0	0	77	4.27	69	24.63	3.1	31	1	10	182	6.5	1.63	5.3	1.71	1.23	0.95	152	4.5	110	2.1	21	2691	1.2	71.38
Cc 2405	2004	Fall	22	Y	F	50.9	29	15	5.85	6.9	0.75	1.5	0	0	88	4.88	63	22.49	2.5	25	1.1	11	248	7.6	1.9	4.5	1.45	1.69	1.31	155	4.6	114	1.4	14	826	1.2	71.38
Cc 2439	2006	Summer	20	N	Unknown		32	9	4.32	4.32	0.09	0.09	0.18	0	95	5.27	57	20.35	3.6	36	1.2	12	135	6.9	1.73	7.9	2.55	0.87	0.68	153	3.3	115	2.4	24	3782	1.3	77.32
Cc 2444	2004	Fall	19	N	Unknown	63.6	15	20	15	2.4	0.8	1	0	0.8	106	5.88	64	22.85	2.5	25	0.5	5	172	6.3	1.58	5.7	1.84	1.11	0.86	162	3.9	118	2	20	1105	0.4	23.79
Cc 2469	2005	Summer	27	N	F	63.5	36	8	6.4	1.28	0.16	0.08	0.08	0	132	7.33	93	33.2	3.4	34	1.3	13	111	7.1	1.78	5.2	1.68	1.37	1.06	155	3.6	111	2.1	21	567	0.5	29.74
Cc 2474	2005	Fall	25	N	F		28	10	6.3	2.4	0	1.2	0.1	0	88	4.88	105	37.49	4.3	43	1.2	12	258	8.9	2.23	6.2	2	1.44	1.11	159	4.3	118	3.1	31	750	1.6	95.17
Cc 2478	2006	Summer	21.5	Y	F	52.4	27	8	5.28	2.4	0.16	0	0.16	0	100	5.55	45	16.07	2.5	25	0.8	8	78	6	1.5	9.6	3.1	0.63	0.48	161	4.3	125	1.7	17	1355	0.6	35.69
Cc 2511	2005	Fall	26	Y	F		29	11	2.53	7.04	0.11	1.32	0	0	68	3.77	86	30.7	3.5	35	1.1	11	176	7.4	1.85	5.4	1.74	1.37	1.06	159	4.1	122	2.4	24	1133	2.8	166.54
Cc 2514	2004	Fall	23	Y	F	70.4	38	14	8.4	4.34	0.84	0	0	0.42	115	6.38	146	52.12	4.3	43	1.4	14	128	7.7	1.93	8.2	2.65	0.94	0.73	159	4.1	114	2.9	29	978	0.7	41.64
Cc 2519	2006	Fall	18	Y	F		28	8	3.76	3.76	0.24	0.16	0.08	0	123	6.83	117	41.77	4.5	45	1.6	16	109	8	2	7.8	2.52	1.03	0.79	154	3.7	111	2.9	29	464	0.3	17.84
Cc 2527	2005	Fall	26	Y	F		29	12	5.52	4.8	0	1.56	0	0.12	99	5.49	59	21.06	3.7	37	1	10	143	7.3	1.83	6.8	2.2	1.07	0.83	155	4.3	115	2.7	27	1764	1	59.48
Cc 2539	2004	Summer	14.5	N	Unknown	67.1	33	9	1.35	7.56	0	0	0	0.09	83	4.61	91	32.49	3.5	35	1.4	14	229	7.4	1.85	8.3	2.68	0.89	0.69	154	4.5	108	2.1	21	3377	1.6	95.17
Cc 2546	2005	Summer	27	N	M	62.1	NA	5	4.2	0.7	0.1	0	0	0	111	6.16	146	52.12	3.3	33	1.3	13	179	6.1	1.53	3.9	1.26	1.56	1.21	145	4.2	103	2	20	4096	0.7	41.64
Cc 2548	2006	Summer	21.5	Y	M	68.6	27	7	2.45	4.13	0.14	0.07	0.21	0	97	5.38	26	9.28	2.9	29	0.9	9	94	6.8	1.7	8	2.58	0.85	0.66	152	3.9	117	2	20	1083	0.7	41.64
Cc 2555	2004	Fall	14	N	Unknown	54.4	26	12	9	2.52	0.24	0.24	0	0	90	5	95	33.92	4	40	1.1	11	173	7.3	1.83	4.2	1.36	1.74	1.35	155	4.2	107	2.9	29	3898	0.9	53.53
Cc 2560	2004	Summer	29	N	F	60.1	26	14	4.48	9.24	0	0.28	0	0	92	5.11	48	17.14	3	30	1.1	11	176	8.9	2.23	7.4	2.39	1.2	0.93	157	4.3	120	1.9	19	839	1.4	83.27
Cc 2580	2004	Summer	27	N	M	66	32	12	8.04	2.64	0.84	0.48	0	0	109	6.05	74	26.42	2.9	29	1.3	13	130	7.7	1.93	5.9	1.91	1.31	1.01	153	4	112	1.6	16	2372	0.2	11.9
Cc 2586	2005	Fall	20	Y	F		28	6	1.86	3.3	0	0.84	0	0	84	4.66	94	33.56	3.4	34	1	10	169	7.7	1.93	8.1	2.62	0.95	0.74	154	4.2	111	2.4	24	401	0.8	47.58
Cc 2587	2004	Summer	27.5	Y	F	65	38	9	3.96	4.14	0	0.45	0.09	0.36	92	5.11	65	23.21	3.3	33	1.3	13	155	9	2.25	6.7	2.16	1.34	1.04	153	4	109	2	20	1034	1.9	113.01
Cc 2591	2004	Summer	25	N	M	62	33	9	1.26	7.65	0	0.09	0	0	94	5.22	138	49.27	4.4	44	1.5	15	200	8	2	5.7	1.84	1.4	1.09	159	4.6	120	2.9	29	724	0.4	23.79
Cc 2594	2006	Summer	21.5	N	M	50.4	32	5	3.05	1.6	0.1	0.25	0	0	130	7.22	34	12.14	2.9	29	0.9	9	116	6.9	1.73	9.1	2.94	0.76	0.59	158	4.1	122	2	20	1674	0.9	53.53
Cc 2598	2006	Summer	20	Y	F	63	27	11	6.93	2.86	0.55	0.55	0.11	0	82	4.55	35	12.5	2.4	24	0.8	8	102	5.9	1.48	7.8	2.52	0.76	0.59	162	3.5	129	1.6	16	2698	0.7	41.64
Cc 2609	2006	Fall	18	Y	Unknown		27	18	13.5	3.78	0.18	0.54	0	0	99	5.49	50	17.85	3.9	39	1.1	11	164	6.7	1.68	6.3	2.03	1.06	0.82	158	4.6	118	2.8	28	1679	0.6	35.69
Cc 2615	2005	Fall	23	Y	F		28	9	7.38	1.44	0.09	0.09	0	0	111	6.16	121	43.2	3.5	35	0.8	8	178	7.4	1.85	6.3	2.03	1.17	0.91	152	4.1	103	2.7	27	697	0.6	35.69
Cc 2626	2006	Summer	19	Y	Unknown		25	9	5.4	2.7	0.36	0.36	0.18	0	133	7.38	34	12.14	3.2	32	0.7	7	124	6.3	1.58	7.7	2.49	0.82	0.63	155	3.3	122	2.5	25	1135	1.4	83.27
Cc 2630	2006	Summer	20	Y	M	64.7	33	13	7.41	5.07	0.26	0.26	0	0	71	3.94	33	11.78	3.8	38	1	10	118	5.4	1.35	8	2.58	0.68	0.52	159	3.9	120	2.8	28	2355	0.9	53.53
Cc 2632	2004	Fall	23	Y	M	54.6	25	10	6.4	3	0.2	0.3	0.1	0	111	6.16	95	33.92	3.7	37	1.1	11	308	7.5	1.88	4.6	1.49	1.63	1.26	156	3.9	110	2.6	26	3199	0.9	53.53
Cc 2633	2004	Fall	12	N	Unknown	58.7	23	16	12.96	2.56	0	0.16	0	0.32	150	8.33	47	16.78	4.1	41	1.4	14	88	5.5	1.38	9.8	3.17	0.56	0.43	160	3.1	118	2.7	27	2671	0.1	5.95
Cc 2635	2004	Summer	28	N	M	56	28	9	3.06	4.41	0.27	1.26	0	0	147	8.16	123	43.91	3.2	32	1	10	221	8.4	2.1	6.9	2.23	1.22	0.94	157	4.9	119	2.2	22	307	0.7	41.64
Cc 2641	2006	Summer	21.5	Y	F	52.7	23	10	5.2	3.1	0.5	0.7	0	0.5	105	5.83	41	14.64	2.3	23	0.7	7	138	7.3	1.83	6.6	2.13	1.11	0.86	153	3.5	118	1.6	16	420	1.3	77.32
Cc 2643	2004	Fall	22	Y	F	67	33	7	3.01	3.22	0.49	0.28	0	0	74	4.11	69	24.63	2.2	22	0.6	6	160	5.9	1.48	5.9	1.91	1	0.77	150	4.4	121	1.6	16	846	0.5	29.74
Cc 2644	2004	Fall	22	N	F	63.9	30	12	8.04	3.36	0.24	0.12	0.24	0	105	5.83	51	18.21	2.8	28	1	10	132	6.8	1.7	8.1	2.62	0.84	0.65	158	4.7	119	1.8	18	688	0.5	29.74
Cc 2651	2004	Fall	24	Y	F	60.9	32	19	12.16	4.37	0.95	0.95	0	0.57	94	5.22	74	26.42	4.1	41	1	10	153	5.7	1.43	5.4	1.74	1.06	0.82	156	4.2	118	3.1	31	1152	0.7	41.64
Cc 2654	2007	Summer	22	N	M		40	9	3.69	4.14	0.36	0.45	0	0.36	75	4.16	30	10.71	3.5	35	0.7	7	119	9.5	2.38	5.6	1.81	1.7	1.31	153	3.9	122	2.8	28	2037	0.2	11.9
Cc 2656	2004	Fall	24	Y	F	57.5	28	10	6.7	2.7	0.4	0.2	0	0	109	6.05	115	41.06	4	40	1.5	15	163	6.5	1.63	6.8	2.2	0.96	0.74	151	4.4	108	2.5	25	1270	1	59.48
Cc 2662	2004	Fall	22	Y	F	61.5	29	7	4.27	2.38	0.35	0	0	0	114	6.33	106	37.84	3.8	38	1.4	14	210	6.4	1.6	7.7	2.49	0.83	0.64	151	4.1	109	2.4	24	1580	0.8	47.58
Cc 2666	2004	Fall	22	Y	M	65.1	28	10	5.1	3.7	0.8	0.4	0	0	102	5.66	129	46.05	3.2	32	1	10	149	8.9	2.23	9.1	2.94	0.98	0.76	158	4.5	116	2.2	22	877	1.2	71.38
Cc 2668	2004	Fall	22	N	F	68.1	30	16	8.96	4	1.6	1.44	0	0	102	5.66	160	57.12	4.2	42	1.6	16	174	8	2	8.4	2.71	0.95	0.74	154	3.7	111	2.6	26	338	1.3	77.32
Cc 2671	2006	Summer	21.5	Y	M	55.3	28	8	6.08	1.28	0.08	0.56	0	0	121	6.72	40	14.28	3.7	37	1.4	14	134	7.4	1.85	8.7	2.81	0.85	0.66	154	3.4	107	2.3	23	473	0.7	41.64
Cc 2677	2004	Fall	11	N	Unknown	54.2	23	22	16.06	4.84	0.88	0.22	0	0	131	7.27	90	32.13	3.3	33	1	10	124	6.1	1.53	8.2	2.65	0.74	0.58	151	2.5	103	2.3	23	2098	0.5	29.74
Cc 2678	2006	Summer	22		F		36	6	3.78	1.98	0.12	0.12	0	0	160	8.88	76	27.13	5.3	53	1.6	16	226	9.1	2.28	7.1	2.29	1.28	0.99	154	4.1	107	3.7	37	1246	0.8	47.58
Cc 2680	2004	Fall	14	N	Unknown	60.7	30	9	5.67	2.79	0.36	0.18	0	0	85	4.72	76	27.13	3.4	34	1	10	121	6.6	1.65	4.3	1.39	1.53	1.19	154	4	107	2.4	24	1842	0.4	23.79
Cc 2687	2004	Summer	27	Y	F	60.7	32	5	1	2.65	0.7	0.65	0	0	127	7.05	61	21.78	3	30	1.3	13	172	10.5	2.63	6.7	2.16	1.57	1.21	158	4.2	112	1.7	17	1461	1.3	77.32
Cc 2688	2006	Summer	21.5	Y	F	54.8	32	5	2.85	2	0.15	0	0	0	97	5.38	105	37.49	2.9	29	1	10	139	9.4	2.35	7.2	2.33	1.31	1.01	153	3.6	113	1.9	19	2666	2	118.96
Cc 2689	2005	Fall	20	N	Unknown		31	7	1.26	4.9	0.14	0.7	0	0	123	6.83	95	33.92	4.6	46	1.1	11	186	7.9	1.98	6	1.94	1.32	1.02	159	4.3	113	3.5	35	1151	0.3	17.84
Cc 2693	2004	Fall	24	Y	F	51.7	32	12	7.92	3.84	0.24	0	0	0	101	5.61	81	28.92	4.3	43	1.5	15	154	6.1	1.53	6.7	2.16	0.91	0.7	158	4.1	113	2.8	28	1624	0.8	47.58
Cc 2694	2004	Fall	14	N	Unknown	60.7	20	6	3.96	1.32	0.48	0.12	0.12	0	74	4.11	88	31.42	4	40	1.2	12	107	7.3	1.83	4.4	1.42	1.66	1.28	156	3.5	114	2.8	28	752	0.6	35.69
Cc 2695	2004	Summer	29	N	F	61.9	33	10	5.8	3.8	0.1	0.2	0.1	0	169	9.38	118	42.13	3.1	31	1.02	10.16	160	9.4	2.35	5.2	1.68	1.81	1.4	154	4.3	116	2.1	21	243	0.4	23.79
Cc 2696	2004	Fall	19.5	Y	F	66.6	32	5	1.5	3.4	0	0.1	0	0	69	3.83	58	20.71	2.4	24	1	10	118	5.8	1.45	6.8	2.2	0.85	0.66	155	4	117	1.4	14	631	0.7	41.64
Cc 2698	2005	Summer	21		Unknown	60.5	23	6	4.68	1.08	0.12	0	0.12	0	153	8.49	78	27.85	2.6	26	0.9	9	129	9.4	2.35	6.5	2.1	1.45	1.12	159	2.9	119	1.7	17	1919	0.4	23.79
Cc 2699	2004	Fall	22	Y	M	63.8	32	15	7.35	6.45	0.75	0.45	0	0	107	5.94	132	47.12	3.2	32	1.4	14	121	7.5	1.88	7.5	2.42	1	0.77	156	4.3	120	1.8	18	654	0.5	29.74
Cc 2700	2004	Summer	28.5	Y	M	57.6	34	10	3.5	5.8	0	0.6	0	0.1	110	6.11	52	18.56	3.2	32	1.1	11	166	7.2	1.8	5.2	1.68	1.38	1.07	159	4.2	118	2.1	21	325	0.9	53.53
Cc 2702	2004	Summer	24	N	F	63.1	28	8	1.92	5.44	0	0.4	0	0.24	118	6.55	45	16.07	3	30	1	10	90	7.3	1.83	6.7	2.16	1.09	0.84	154	4	118	2	20	725	1	59.48
Cc 2703	2004	Summer	28	N	M	63	31	10	5.2	3.6	1	0.2	0	0	139	7.71	98	34.99	2.5	25	0.8	8	190	7	1.75	6.2	2	1.13	0.87	156	4.9	120	1.7	17	971	0.2	11.9
Cc 2705	2004	Summer	28	N	M	58.3	30	5	2.55	2.05	0.15	0.25	0	0	136	7.55	73	26.06	3	30	1.2	12	178	7.3	1.83	6.2	2	1.18	0.91	159	4.2	116	1.8	18	1336	0.7	41.64
Cc 2706	2004	Fall	24	Y	F	56	33	12	6.72	3.96	0.6	0.72	0	0	99	5.49	107	38.2	3.3	33	1	10	145	7.9	1.98	5.8	1.87	1.36	1.05	158	4.3	110	2.3	23	930	1.7	101.12
Cc 2709	2006	Summer	18	Y	F	60.8	31	12	6.24	5.16	0	0.48	0.12	0	150	8.33	158	56.41	3	30	1.1	11	116	8.1	2.03	10.1	3.26	0.8	0.62	158	3.2	113	1.9	19	991	1.5	89.22
Cc 2717	2004	Fall	19.5	Y	F	74.6	28	10	5.3	4	0.4	0.3	0	0	91	5.05	40	14.28	3.6	36	1.4	14	296	6.5	1.63	7.4	2.39	0.88	0.68	153	4.4	119	2.2	22	2722	0.4	23.79
Cc 2724	2004	Summer	25	Y	F	77.8	29	5	3.2	1.3	0	0.25	0.05	0.2	96	5.33	55	19.64	2.4	24	1.1	11	149	8.1	2.03	7.3	2.36	1.11	0.86	153	6.1	110	1.3	13	877	0.6	35.69
Cc 2726	2004	Summer	25	Y	F	63.3	27	9	4.86	3.24	0	0.18	0	0.72	84	4.66	122	43.55	2.1	21	0.7	7	119	6.1	1.53	5.5	1.78	1.11	0.86	158	4.2	123	1.4	14	903	1	59.48
Cc 2727	2005	Summer	29.5	N	F	63.9	40	6	0	3.3	0	2.7	0	0	112	6.22	35	12.5	3.8	38	1.2	12	126	6.5	1.63	5.6	1.81	1.16	0.9	153	4	112	2.6	26	1293	1.1	65.43
Cc 2729	2007	Summer	22	N	F		38	13	6.37	5.59	0.13	0.52	0.13	0.26	65	3.61	28	10	3.7	37	0.9	9	103	8.4	2.1	6.2	2	1.35	1.05	156	3.8	124	2.8	28	950	0.1	5.95
Cc 2734	2004	Fall	24	Y	F	64.9	26	10	5.1	4	0.4	0.5	0	0	131	7.27	143	51.05	5.2	52	1.4	14	203	8.3	2.08	8.1	2.62	1.02	0.79	156	5.1	108	3.8	38	3684	1.1	65.43
Cc 2737	2006	Summer	19	Y	F	70.2	23	8	5.52	2.08	0.08	0.08	0.08	0.16	111	6.16	75	26.78	2.8	28	0.8	8	175	6.5	1.63	5.1	1.65	1.27	0.99	156	3.4	117	2	20	2057	1.6	95.17
Cc 2766	2005	Summer	29.5	N	F	61.7	35	8	0	3.12	0.08	4.8	0	0	163	9.05	63	22.49	3.9	39	1.4	14	238	6.7	1.68	5.9	1.91	1.14	0.88	150	4.6	115	2.5	25	693	0.6	35.69
Cc 2767	2004	Fall	22	N	Unknown	59.1	25	6	4.38	1.26	0.3	0.06	0	0	82	4.55	52	18.56	3.6	36	0.9	9	263	5.5	1.38	7.1	2.29	0.77	0.6	163	4.7	124	2.7	27	1258	0.8	47.58
Cc 2789	2004	Summer	25	Y	F	74.1	34	8	3.44	3.92	0	0.16	0	0.48	120	6.66	116	41.41	3.1	31	1.2	12	170	7.6	1.9	5.8	1.87	1.31	1.01	156	4.8	112	1.9	19	624	0.9	53.53
Cc 2800	2004	Summer	27	N	F	55.3	9	25	14	7.5	1.5	1.5	0.5	0	80	4.44	86	30.7	2.8	28	0.6	6	195	7.3	1.83	6.4	2.07	1.14	0.88	161	4.5	120	2.2	22	251	1.5	89.22
Cc 2802	2004	Summer	27	N	M	67.3	31	9	2.16	5.04	0.72	1.08	0	0	152	8.44	87	31.06	3.9	39	1.1	11	159	8.1	2.03	7.4	2.39	1.09	0.85	159	4.4	120	2.8	28	419	0.5	29.74
Cc 2816	2005	Fall	26	Y	F		30	10	5.9	3.3	0	0.6	0	0.2	137	7.6	148	52.84	4	40	1.3	13	220	7.6	1.9	8.3	2.68	0.92	0.71	159	4.1	115	2.7	27	1729	0.9	53.53
Cc 2818	2005	Fall	25		F		34	5	2.2	2.8	0	0	0	0	80	4.44	61	21.78	3.1	31	1	10	134	8.4	2.1	6.5	2.1	1.29	1	157	4.7	117	2.1	21	2185	1.1	65.43
Cc 2825	2005	Summer	27	N	Unknown	59.8	31	6	4.44	1.08	0.12	0.36	0	0	99	5.49	38	13.57	2.7	27	0.9	9	88	6.5	1.63	8.1	2.62	0.8	0.62	153	3.4	113	1.8	18	2414	0.6	35.69
Cc 2826	2005	Summer	27	N	F	58.1	30	6	4.62	1.02	0.3	0	0.06	0	105	5.83	97	34.63	2.6	26	0.7	7	169	7.6	1.9	4.3	1.39	1.77	1.37	154	3.9	112	1.9	19	1076	1.6	95.17
Cc 2827	2005	Summer	28	N	F	61.6	28	8	0.8	5.2	0	2	0	0	105	5.83	62	22.13	2.8	28	1	10	110	7	1.75	5.7	1.84	1.23	0.95	159	4.9	118	1.8	18	1083	0.5	29.74
Cc 2828	2005	Summer	28	N	F	61.6	35	7	0.28	2.87	0	3.85	0	0	107	5.94	79	28.2	4.3	43	1.3	13	314	7.1	1.78	7.2	2.33	0.99	0.76	161	5.2	114	3	30	3337	1	59.48
Cc 2829	2005	Fall	14	N	Unknown		25	7	2.31	4.2	0	0.42	0	0.07	71	3.94	50	17.85	2.7	27	0.9	9	131	5.8	1.45	6	1.94	0.97	0.75	150	3.5	122	1.8	18	2340	0.9	53.53
Cc 2832	2005	Summer	23	N	Unknown	69	32	7	5.18	1.54	0.14	0	0.14	0	99	5.49	33	11.78	2.7	27	0.9	9	136	6.5	1.63	6.5	2.1	1	0.77	161	4.2	114	1.8	18	1300	0.7	41.64
Cc 2834	2006	Summer	22		F		25	10	6.8	3.1	0	0.1	0	0	126	6.99	57	20.35	3.4	34	1	10	135	7.7	1.93	7.3	2.36	1.05	0.82	151	3.8	110	2.4	24	1417	0.7	41.64
Cc 2882	2006	Summer	20	N	Unknown		33	12	7.2	3.12	0	1.44	0.12	0.12	125	6.94	36	12.85	3.4	34	1.3	13	221	7.1	1.78	9.5	3.07	0.75	0.58	154	3	110	2.1	21	1417	2.4	142.75
Cc 2894	2005	Fall	9	N	Unknown		24	7	3.08	3.5	0	0.42	0	0	88	4.88	33	11.78	2.2	22	0.6	6	114	6.1	1.53	5.6	1.81	1.09	0.84	153	2.8	121	1.6	16	4785	1	59.48
Cc 2896	2006	Summer	18	Y	M	64.7	35	8	3.68	3.92	0.08	0.32	0	0	166	9.21	53	18.92	3.6	36	1.3	13	127	6.1	1.53	9.5	3.07	0.64	0.5	155	3.8	113	2.3	23	1210	0.6	35.69
Cc 2897	2006	Summer	19	Y	F		26	9	4.86	3.6	0.36	0.18	0	0	183	10.16	171	61.05	3.3	33	1.1	11	101	8.5	2.13	7.3	2.36	1.16	0.9	152	4.7	113	2.2	22	1743	0.3	17.84
Cc 2898	2006	Summer	19.5	Y	F		26	4	2.76	0.96	0.28	0	0	0	84	4.66	41	14.64	2.5	25	0.6	6	175	5.7	1.43	6.7	2.16	0.85	0.66	152	3.5	119	1.9	19	2194	0.4	23.79
Cc 2899	2006	Summer	20	N	Unknown		35	13	5.72	6.37	0.78	0.13	0	0	97	5.38	30	10.71	3	30	0.9	9	107	5.6	1.4	8.5	2.75	0.66	0.51	152	3	113	2.1	21	1501	0.8	47.58
Cc 2900	2006	Summer	19	Y	F		32	9	3.33	4.77	0.63	0.18	0	0.09	80	4.44	23	8.21	3.3	33	1	10	115	6.1	1.53	7.9	2.55	0.77	0.6	150	3.1	114	2.3	23	4321	1	59.48
Cc 2901	2006	Summer	19	Y	F		28	9	3.15	4.23	0.81	0.45	0	0.36	103	5.72	28	10	2.7	27	0.4	4	78	6.7	1.68	7.2	2.33	0.93	0.72	152	3.7	125	2.3	23	977	0.6	35.69
Cc 2902	2006	Summer	20	N	Unknown		25	12	6.48	5.04	0.24	0.24	0	0	98	5.44	20	7.14	4.1	41	0.9	9	153	7.3	1.83	8.6	2.78	0.85	0.66	156	3.9	118	3.2	32	1446	0.6	35.69
Cc 2904	2005	Summer	26	N	Unknown	63.2	31	11	4.18	5.06	0	1.54	0.22	0	85	4.72	39	13.92	2.6	26	0.5	5	390	5.8	1.45	7.2	2.33	0.81	0.62	150	4.3	121	2.1	21	376	0.7	41.64
Cc 2905	2005	Summer	26	N	F	59.2	33	8	5.36	2.16	0.16	0.32	0	0	85	4.72	60	21.42	2.9	29	0.8	8	175	6.5	1.63	6.3	2.03	1.03	0.8	156	3.7	116	2.1	21	13310	0.9	53.53
Cc 2907	2005	Summer	29.5	N	F	65.9	24	8	0	5.52	0	2.4	0	0	81	4.5	73	26.06	2.3	23	0.5	5	127	5.7	1.43	7	2.26	0.81	0.63	152	4.5	117	1.8	18	376	0.7	41.64
Cc 2909	2005	Summer	28	Y	F	56.4	28	9	0	7.38	0	1.62	0	0	138	7.66	66	23.56	4.1	41	1	10	237	7.7	1.93	5.9	1.91	1.31	1.01	156	5.1	123	3.1	31	392	0.8	47.58
Cc 2910	2005	Summer	29	N	Unknown	56	38	10	7.5	2	0.3	0.2	0	0	135	7.49	65	23.21	4.5	45	1.4	14	228	7.5	1.88	7	2.26	1.07	0.83	152	4.1	112	3.1	31	792	0.5	29.74
Cc 2911	2005	Summer	29	N	F	55	35	6	3.18	2.34	0.06	0.12	0.18	0	125	6.94	93	33.2	3.3	33	0.8	8	186	7.2	1.8	6.1	1.97	1.18	0.91	157	4.3	118	2.5	25	1115	0.2	11.9
Cc 2912	2005	Summer	28	N	F	65.9	34	8	6.48	1.2	0.16	0.16	0	0	103	5.72	50	17.85	3.9	39	1.3	13	225	7.1	1.78	7.5	2.42	0.95	0.73	160	5.1	115	2.6	26	1042	2.4	142.75
Cc 2913	2005	Summer	29	N	Unknown	75.9	38	6	4.08	1.68	0.12	0.12	0	0	130	7.22	17	6.07	3.4	34	1.2	12	198	7.1	1.78	6.9	2.23	1.03	0.8	153	3.8	112	2.2	22	2435	0.3	17.84
Cc 2914	2005	Summer	28.5	N	M	57.4	33	8	0	4	0	4	0	0	106	5.88	54	19.28	3	30	0.9	9	152	6.3	1.58	7	2.26	0.9	0.7	157	4.7	120	2.1	21	1723	0.9	53.53
Cc 2915	2007	Summer	28		F		20	16	12.48	3.04	0.16	0.32	0	0	94	5.22	69	24.63	3.3	33	0.9	9	184	7.6	1.9	6.9	2.23	1.1	0.85	159	4.7	120	2.4	24	399	0.8	47.58
Cc 2916	2005	Summer	28.5	N	M	66.9	34	13	7.54	4.29	0.13	1.04	0	0	86	4.77	93	33.2	3.2	32	0.7	7	286	6.8	1.7	6.8	2.2	1	0.77	155	4.3	120	2.5	25	959	1.3	77.32
Cc 2917	2005	Fall	25	Y	M		31	9	3.42	4.23	0.09	1.26	0	0	128	7.1	128	45.7	4.6	46	1.6	16	269	10.5	2.63	7	2.26	1.5	1.16	161	4.6	114	3	30	297	1.2	71.38
Cc 2918	2005	Summer	28.5	N	M	61.7	36	14	6.86	6.3	0.42	0.42	0	0	133	7.38	50	17.85	3.8	38	1.3	13	213	8	2	5.6	1.81	1.43	1.11	150	4.1	112	2.5	25	1034	0.7	41.64
Cc 2919	2005	Summer	29	N	M		30	10	6.9	2.7	0.2	0.2	0	0	124	6.88	104	37.13	4.7	47	1	10	220	7.6	1.9	6.7	2.16	1.13	0.88	157	5.1	107	3.7	37	954	0.9	53.53
Cc 2920	2005	Summer	25.5	N	F		28	7	4.69	2.31	0	0	0	0	97	5.38	53	18.92	2.4	24	0.8	8	116	7	1.75	8.3	2.68	0.84	0.65	156	4.3	125	1.6	16	758	0.7	41.64
Cc 2921	2005	Fall	24	Y	M		33	9	3.6	4.77	0	0.54	0	0.09	121	6.72	176	62.83	4.1	41	1.4	14	152	8.4	2.1	6.1	1.97	1.38	1.07	155	4.5	105	2.7	27	610	1.1	65.43
Cc 2922	2005	Summer	28	N	F		32	8	5.28	2.4	0	0.24	0.08	0	45	2.5	63	22.49	3.7	37	0.9	9	249	6.1	1.53	6.7	2.16	0.91	0.7	156	5	116	2.8	28	2898	0.9	53.53
Cc 2928	2005	Summer	25.5	N	F		29	7	2.87	3.71	0.21	0.21	0	0	91	5.05	37	13.21	3.2	32	0.7	7	111	7	1.75	7.2	2.33	0.97	0.75	150	3.6	117	2.5	25	252	0.5	29.74
Cc 2930	2005	Fall	16	N	Unknown		15	9	3.24	5.13	0	0.63	0	0	57	3.16	47	16.78	2.2	22	0.6	6	143	5.5	1.38	5.9	1.91	0.93	0.72	162	3.3	124	1.6	16	4401	1.1	65.43
Cc 2931	2005	Fall	20	N	Unknown		32	7	3.15	3.22	0	0.42	0	0.21	101	5.61	105	37.49	4	40	1.3	13	162	8.7	2.18	7.6	2.45	1.14	0.89	154	3.9	107	2.7	27	1255	0.7	41.64
Cc 2932	2005	Summer	28	N	M		27	4	2.36	1.28	0	0.32	0.04	0	103	5.72	68	24.28	4	40	1.1	11	232	6.7	1.68	6.7	2.16	1	0.77	154	4.4	112	2.9	29	350	0.8	47.58
Cc 2933	2005	Fall	25	N	M		34	10	5	3.2	0	1.6	0.1	0.1	114	6.33	122	43.55	3.8	38	1.1	11	214	9.3	2.33	6.6	2.13	1.41	1.09	168	5.7	120	2.7	27	1119	1.1	65.43
Cc 2934	2005	Fall	20	N	Unknown		21	9	3.06	5.04	0	0.81	0	0.09	88	4.88	93	33.2	3.1	31	0.7	7	150	7.6	1.9	3.6	1.16	2.11	1.63	145	4.3	106	2.4	24	296	1	59.48
Cc 2935	2005	Fall	19	N	Unknown		10	13	11.31	1.17	0.26	0	0.002	0	55	3.05	71	25.35	2.4	24	0.5	5	175	5.3	1.33	5.7	1.84	0.93	0.72	153	3.2	117	1.9	19	3411	0.7	41.64
Cc 2936	2006	Summer	27		F		35	12	8.76	2.52	0.24	0.12	0	0.36	121	6.72	97	34.63	4.4	44	1.4	14	165	10.2	2.55	8.9	2.87	1.15	0.89	155	3.9	107	3	30	483	0.8	47.58
Cc 2937	2005	Fall	25	N	F		34	7	3.5	3.22	0	0.21	0.07	0	106	5.88	65	23.21	3.2	32	1	10	191	9.1	2.28	6.7	2.16	1.36	1.05	163	4.6	120	2.2	22	1919	1.4	83.27
Cc 2938	2005	Fall	17	N	Unknown		31	12	8.16	3.12	0.12	0.6	0	0	85	4.72	60	21.42	3.8	38	0.9	9	86	6.9	1.73	8.4	2.71	0.82	0.64	153	3.5	103	2.9	29	1415	0.9	53.53
Cc 2942	2006	Summer	20	Y	F	58.1	28	10	3.1	6.3	0.2	0.4	0	0	90	5	62	22.13	2.6	26	0.8	8	114	6.9	1.73	7.4	2.39	0.93	0.72	156	3.3	113	1.8	18	1190	1.2	71.38
Cc 2962	2005	Fall	17	N	Unknown		25	8	6.88	0.96	0	0	0	0.16	106	5.88	104	37.13	3.6	36	1.1	11	127	6.6	1.65	5.8	1.87	1.14	0.88	157	3.7	105	2.5	25	1744	0.2	11.9
Cc 2964	2005	Fall	19.5	N	Unknown		32	12	9.72	1.8	0	0.24	0.24	0	124	6.88	47	16.78	3.8	38	1	10	98	7.2	1.8	6.1	1.97	1.18	0.91	157	4.3	118	2.8	28	586	0.4	23.79
Cc 2969	2006	Summer	21	N	F		27	NA							130	7.22	165	58.91	3.2	32	0.9	9	113	8.2	2.05	11.3	3.65	0.73	0.56	165	4.5	119	2.3	23	1052	0.7	41.64
Cc 2997	2007	Summer	22	N	Unknown		38	13	4.29	7.8	0.39	0.52	0	0	68	3.77	25	8.93	3.5	35	0.9	9	86	8.5	2.13	6.3	2.03	1.35	1.04	158	3.8	123	2.6	26	1168	0.2	11.9
Cc 3067	2006	Fall	21	Y	F		21	27	21.6	4.59	0.81	0	0	0	233	12.93	72	25.7	4.3	43	1.1	11	203	7.8	1.95	7.2	2.33	1.08	0.84	154	3.5	115	3.2	32	1449	0.8	47.58
Cc 3146	2006	Fall	18	Y	M		25	13	9.23	3.64	0	0.13	0	0	112	6.22	98	34.99	3.4	34	1.1	11	144	9.4	2.35	7.2	2.33	1.31	1.01	158	4.5	120	2.3	23	518	0.1	5.95
Cc 3147	2006	Fall	21	Y	M		24	9	5.85	2.7	0.36	0.09	0	0	128	7.1	87	31.06	3.6	36	1.1	11	223	6.2	1.55	6.8	2.2	0.91	0.71	155	3.7	112	2.5	25	5123	0.1	5.95
Cc 3149	2006	Fall	21	Y	M		20	12	9.96	1.56	0.24	0.12	0.12	0	123	6.83	123	43.91	3.3	33	1.2	12	150	8.2	2.05	7.5	2.42	1.09	0.85	157	4.2	116	2.1	21	878	0.2	11.9
Cc 3187	2006	Fall	21	Y	F		28	12	9.72	1.92	0.24	0	0.12	0	77	4.27	43	15.35	4.4	44	1.5	15	93	8.6	2.15	7.1	2.29	1.21	0.94	156	4.3	109	2.9	29	2448	1.8	107.06
Cc 3223	2007	Summer	22	N	F		40	10	4.1	5.3	0	0.4	0	0.2	78	4.33	19	6.78	3.9	39	1.3	13	112	7.3	1.83	8.8	2.84	0.83	0.64	159	3.8	118	2.6	26	2626	0.1	5.95
Cc 3269	2005	Fall	26	Y	F		32	12	4.44	5.28	0	2.04	0	0.24	127	7.05	105	37.49	3.9	39	1	10	209	7.7	1.93	6	1.94	1.28	0.99	159	4.9	117	2.9	29	779	2	118.96
Cc 3291	2007	Summer	22	N	F		39	12	4.92	6.6	0.36	0.12	0	0	86	4.77	33	11.78	3.7	37	1.2	12	76	7.3	1.83	7.3	2.36	1	0.77	154	3.6	119	2.5	25	1363	0.1	5.95
Cc 3403	2007	Summer	22	N	F		31	15	7.8	6.75	0	0	0	0.45	74	4.11	25	8.93	3.6	36	1.1	11	118	7.6	1.9	6.4	2.07	1.19	0.92	154	3.8	122	2.5	25	2209	0.1	5.95
Cc 3589	2005	Fall	19	N	Unknown		32	9	6.84	1.89	0.27	0	0	0	91	5.05	57	20.35	3.4	34	0.9	9	118	5.4	1.35	11.1	3.59	0.49	0.38	155	3.9	102	2.5	25	1560	0.3	17.84
Cc 3949	2004	Summer	27.5	Y	F	55.2	24	6	0	5.52	0	0.36	0	0.12	115	6.38	190	67.83	4.2	42	1.4	14	228	8.6	2.15	7	2.26	1.23	0.95	157	4.5	117	2.8	28	1084	1.5	89.22
Cc 4027	2004	Fall	11	N	Unknown	60.6	19	14	9.38	4.06	0.42	0.14	0	0	81	4.5	62	22.13	3.8	38	1.3	13	101	7	1.75	5.3	1.71	1.32	1.02	150	2.5	108	2.5	25	272	0.8	47.58
Cc 4110	2004	Summer	24	N	M	67.3	36	9	3.33	5.13	0	0.09	0	0.45	145	8.05	117	41.77	5	50	1.7	17	139	7.8	1.95	8.4	2.71	0.93	0.72	155	3.8	108	3.3	33	1071	0.7	41.64
